# Supplementary figures and images for: Transcription Factor and miRNA Interplays Can Manifest the Survival of ccRCC Patients
Source: MDPI journal article supplement (doi:10.3390/cancers11111668), 2019-10-28

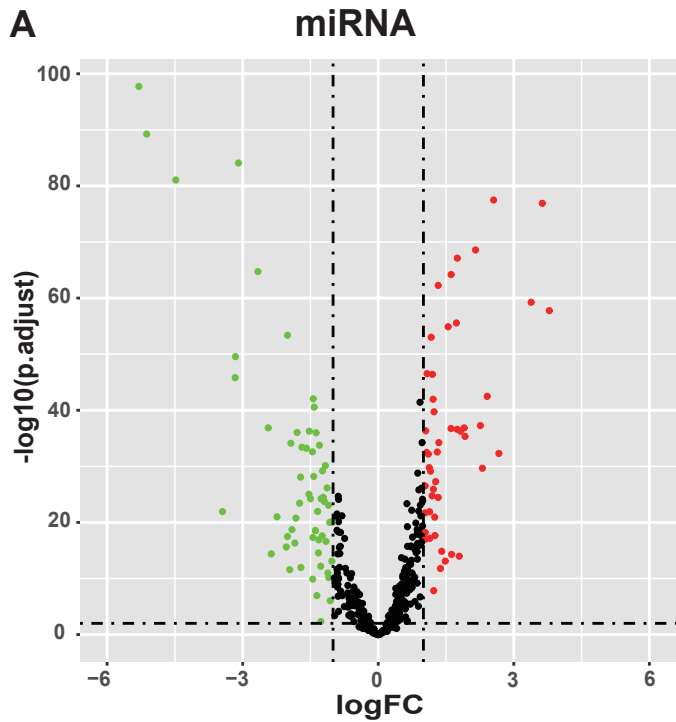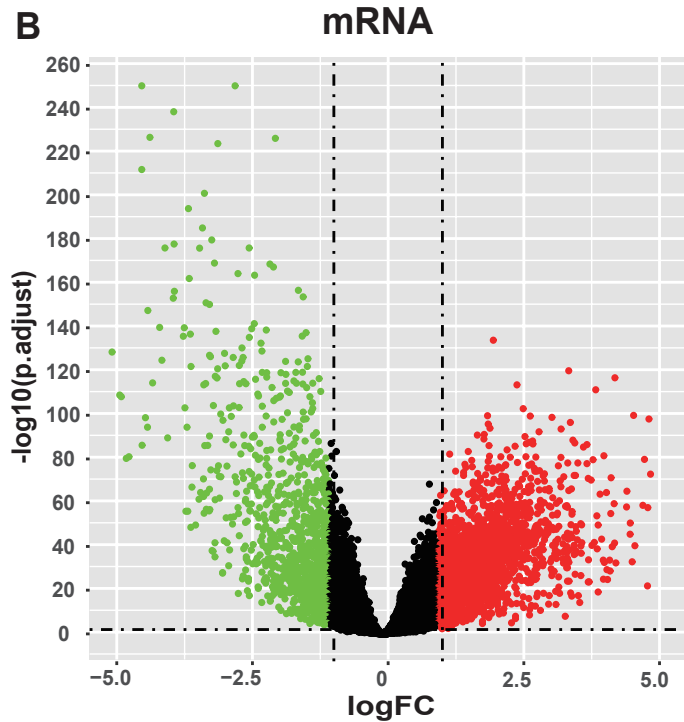

Supplement: s1 [file s1]

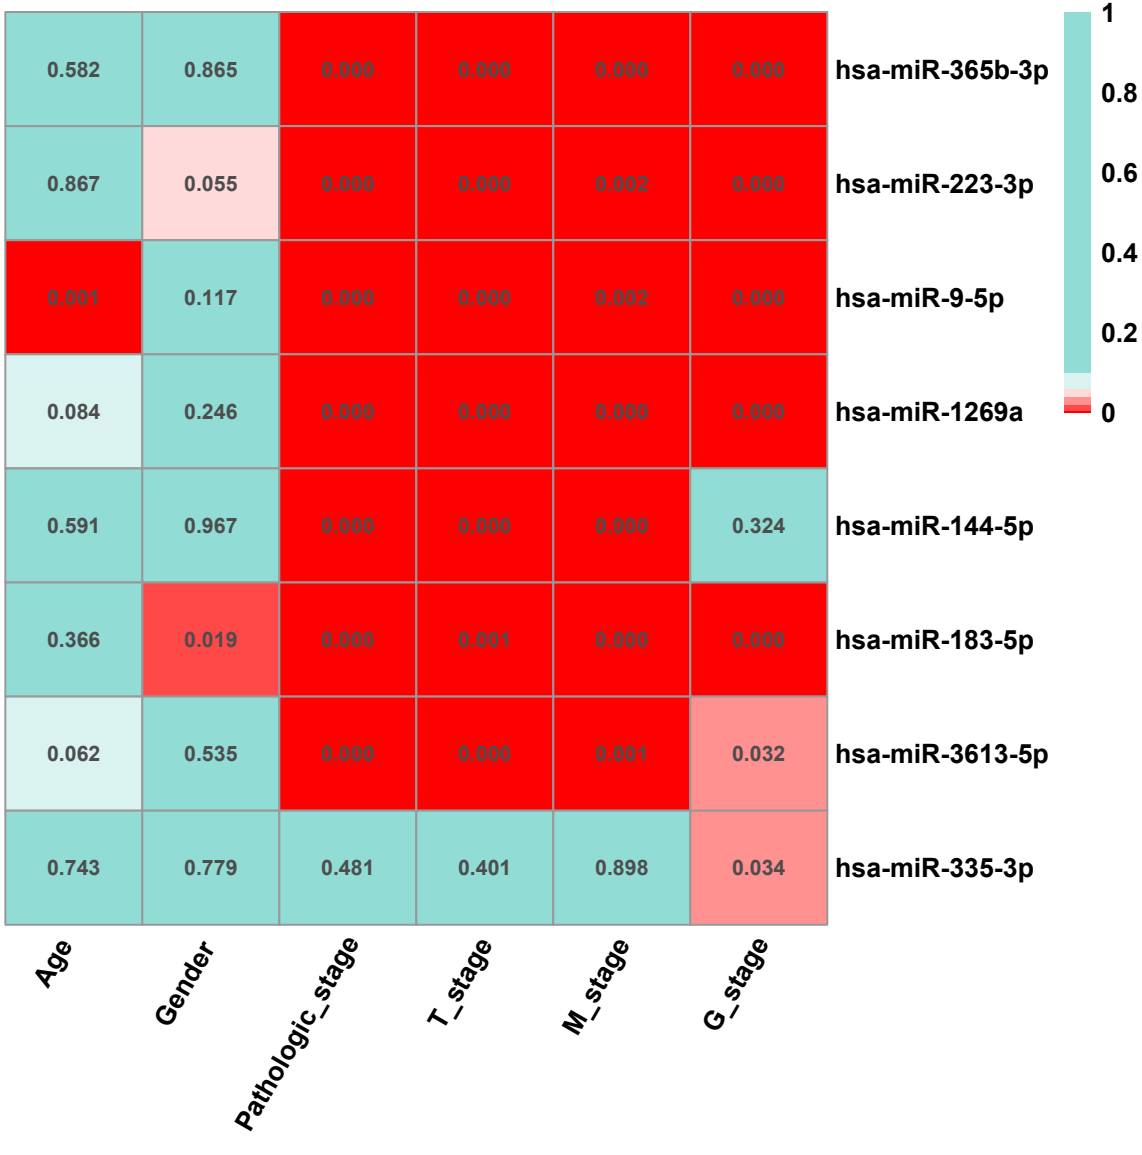

Supplement: s1 [file s1]

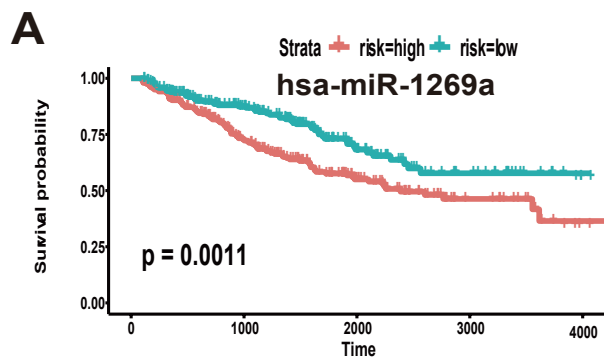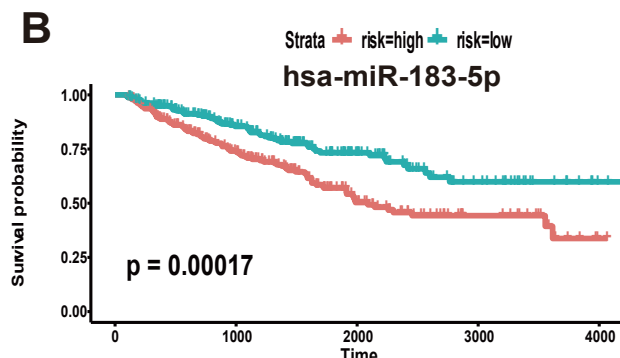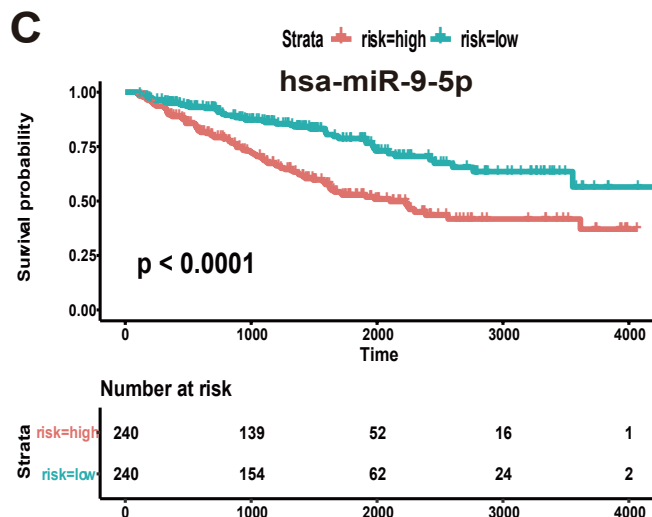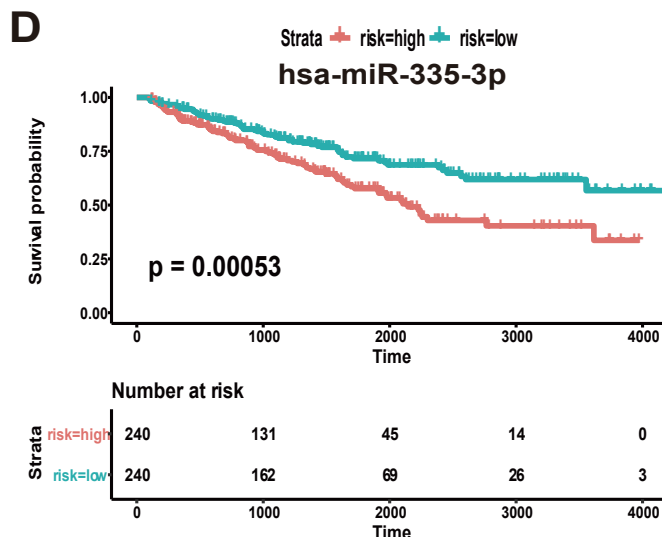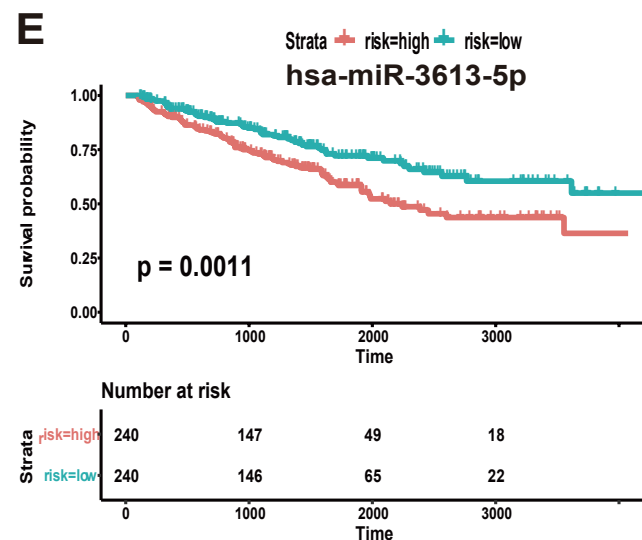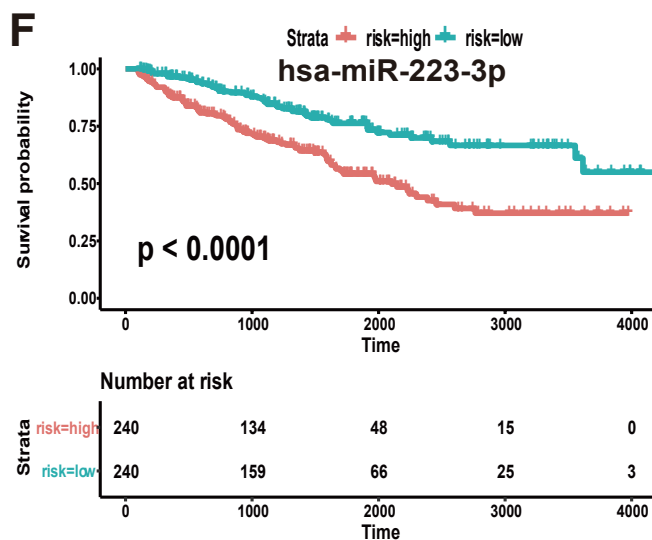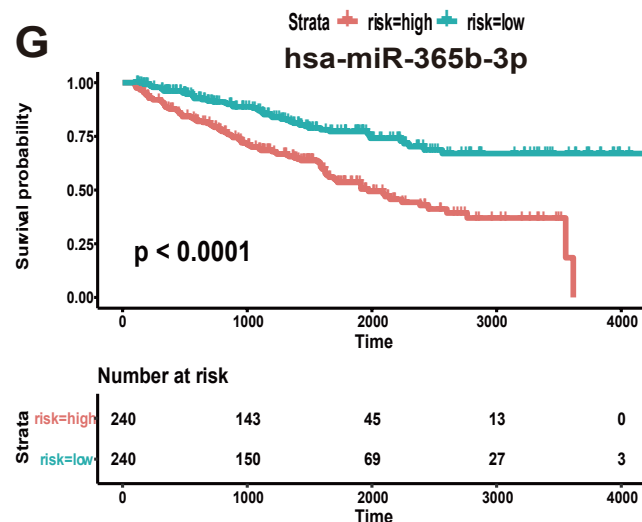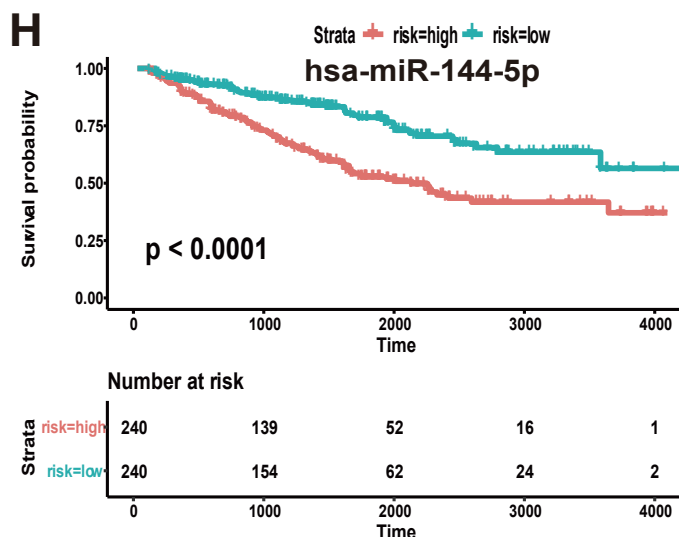

Supplement: s1 [file s1]

**A**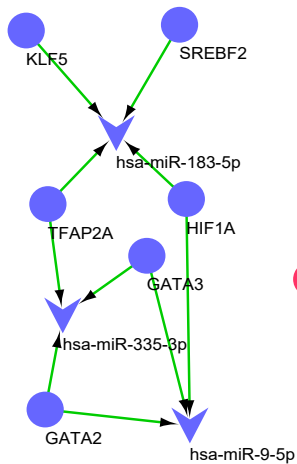**B**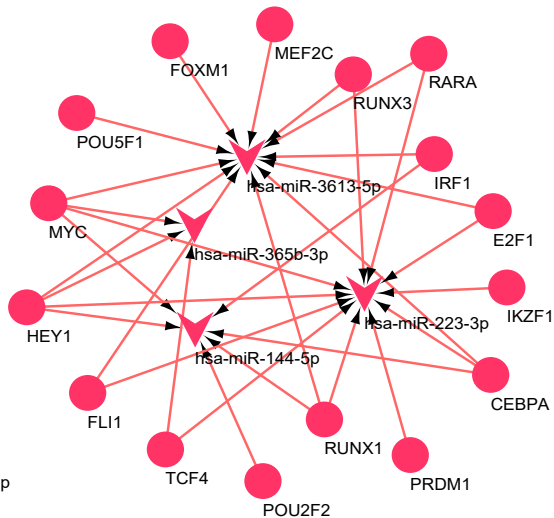

Supplement: s1 [file s1]

**A**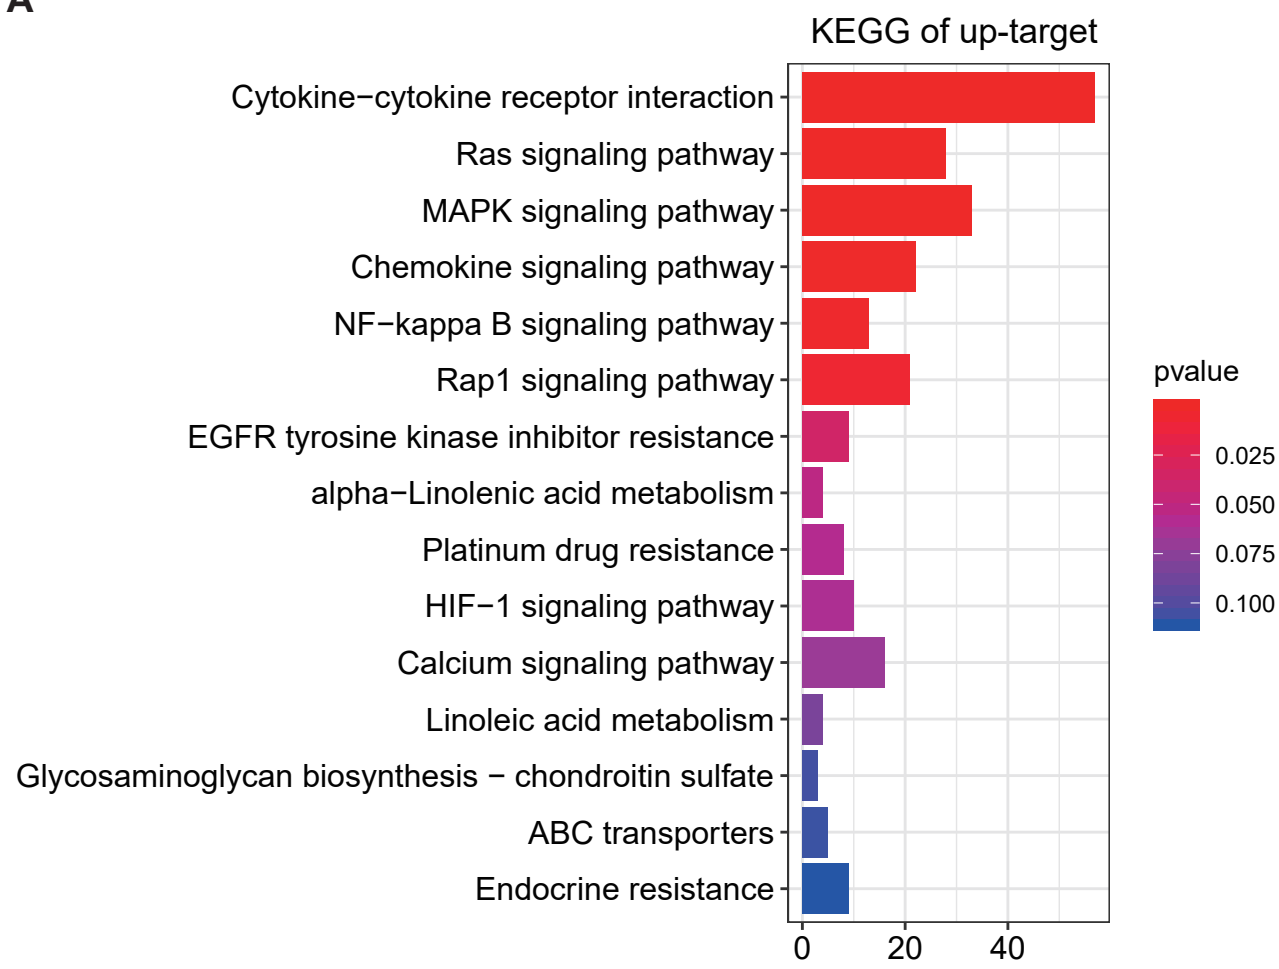**B**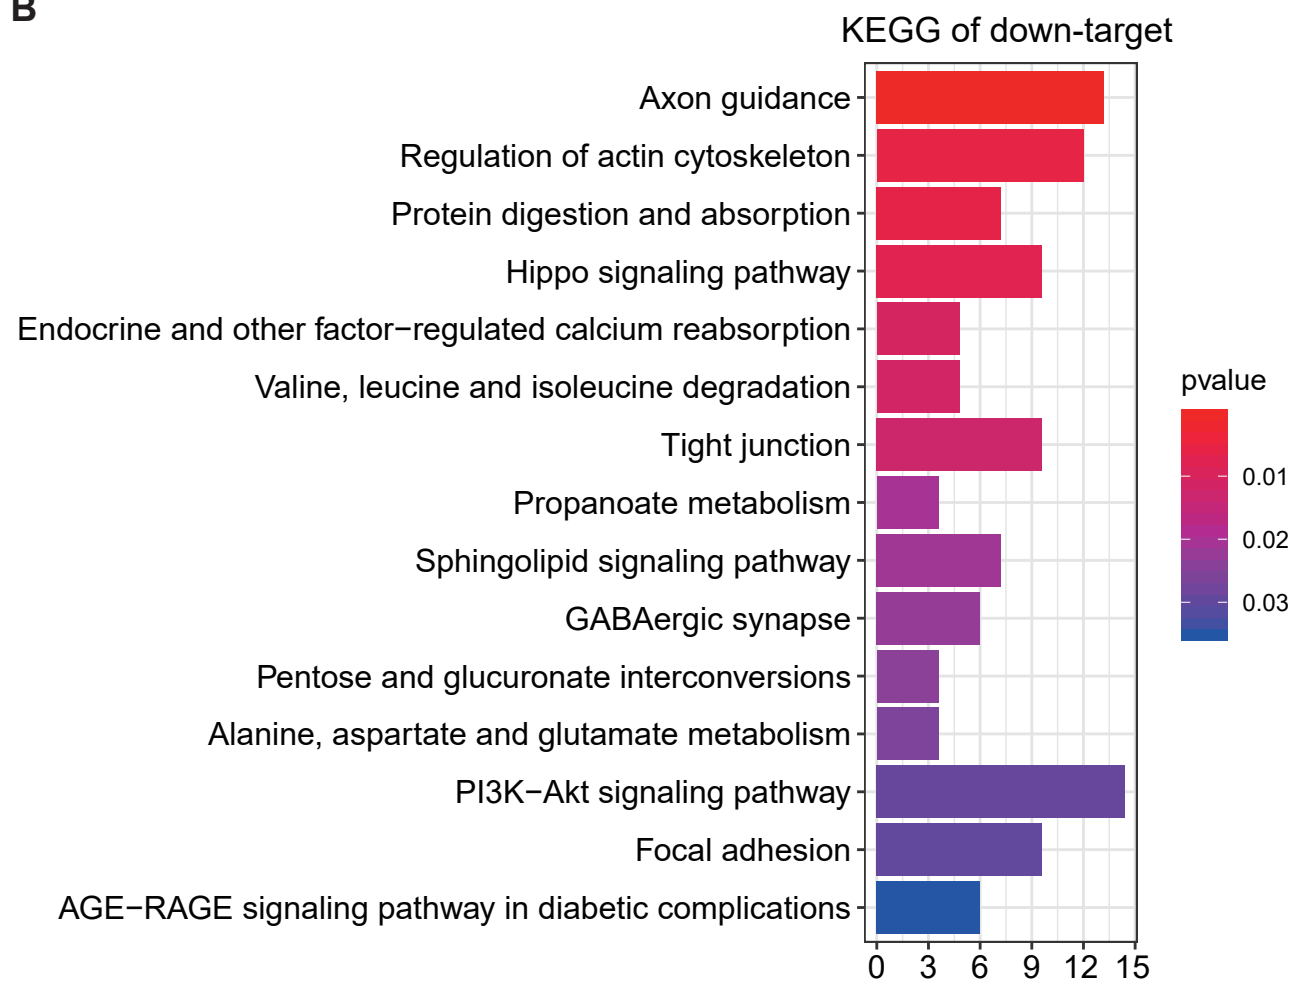

Supplement: s1 [file s1]

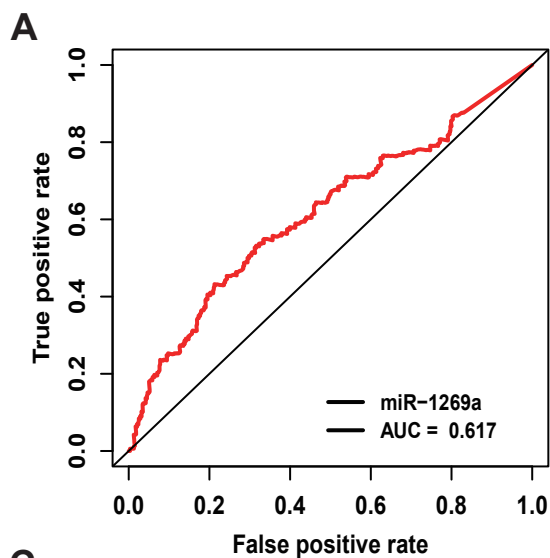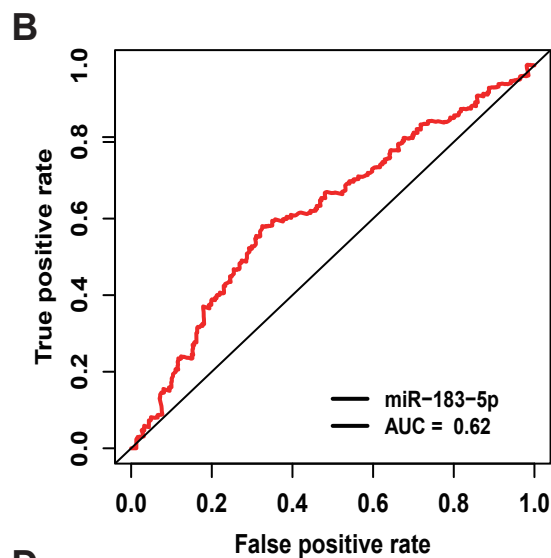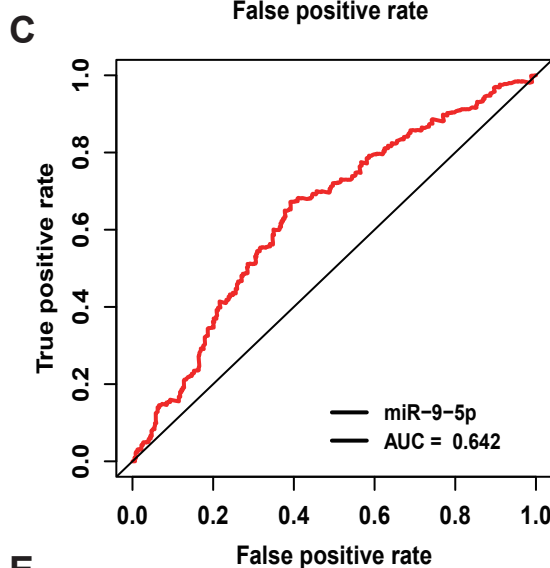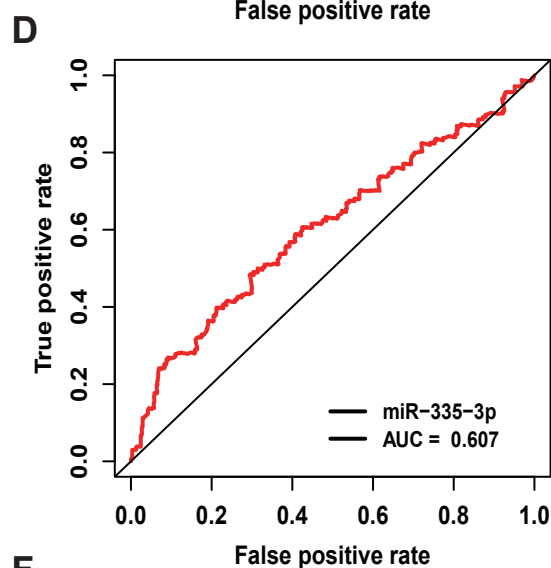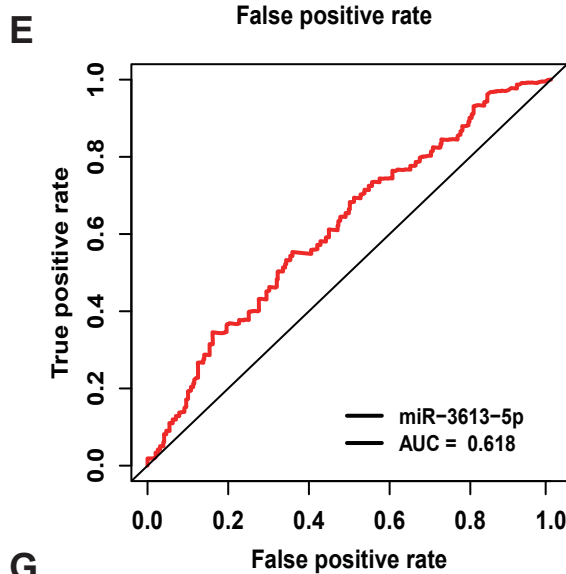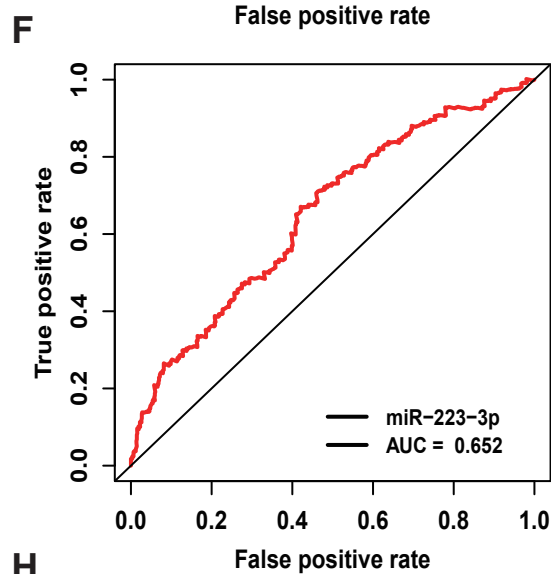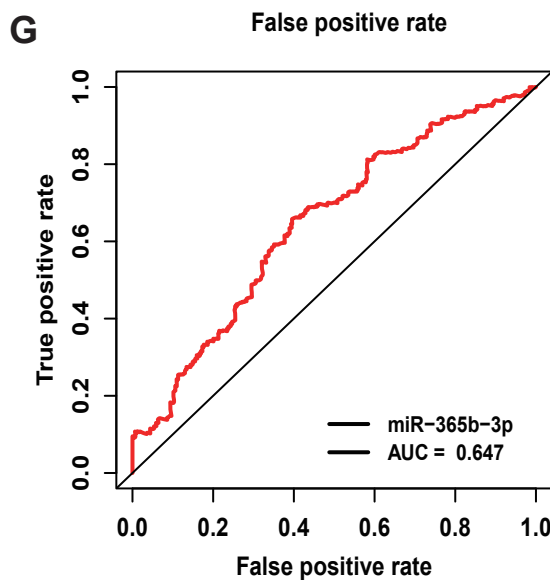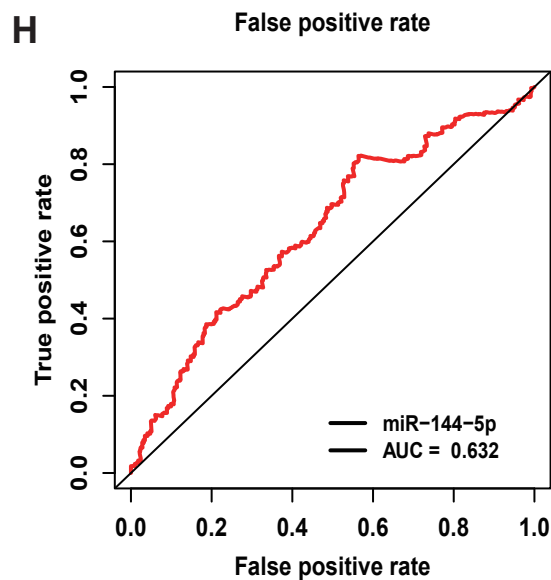

Supplement: s1 [file s1]
